# Supplementary figures and images for: A generic approach based on long-lifetime fluorophores for the assessment of protein binding to polymer nanoparticles by fluorescence anisotropy
Source: Royal Society of Chemistry journal article supplement (doi:10.1039/d3nr02460a), 2024-01-01

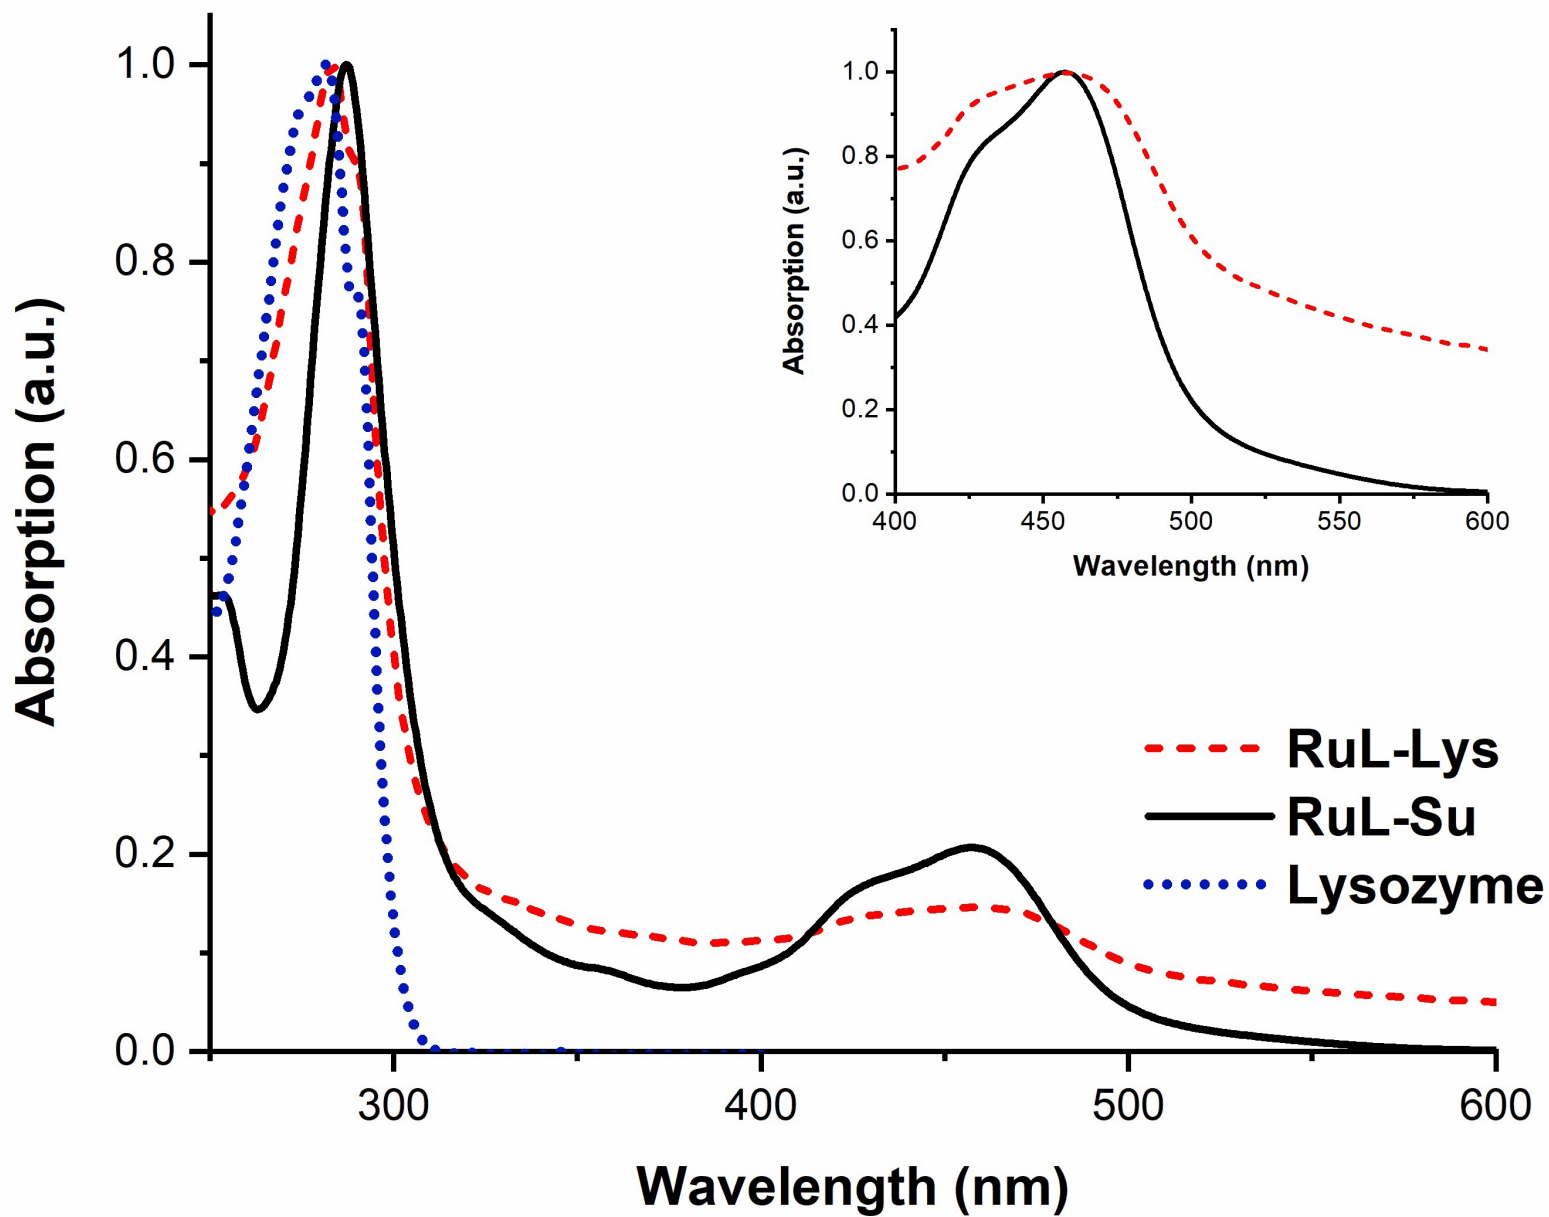

Supplement: d3nr02460a3.pdf [file d3nr02460a3.pdf]
